# Supplementary material for: Supramolecular assembly and host–guest interaction of crown ether with inorganic acid and organic amine containing carboxyl groups
Source: Royal Society of Chemistry journal article supplement (doi:10.1039/c3nj01005h), 2013-11-12
Supplement: c3nj01005h.pdf [file c3nj01005h.pdf]

## Supporting Information

# Supramolecular assembly and host-guest interaction of crown ether with inorganic acid and organic amine containing carboxyl group

Yang-Hui Luo, Shu-Wang Ge, Wen-Tao Song, and Bai-Wang Sun\*

*College of Chemistry and Chemical Engineering, Southeast University, Nanjing 211189, P. R. China*

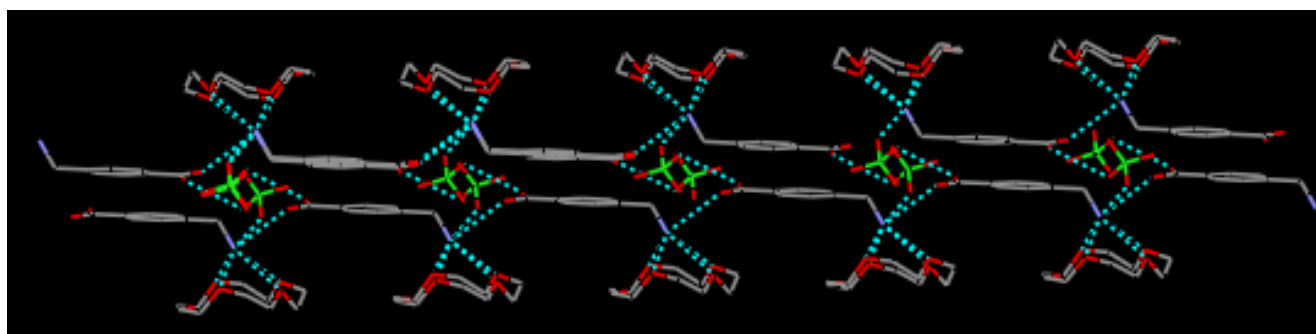

**Fig.S1** 1D connecting motif of complexes 2

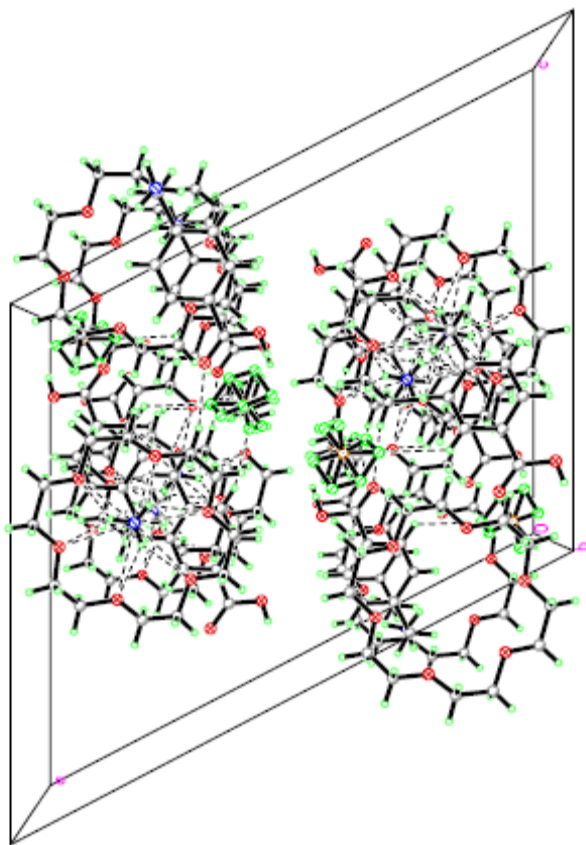

**Fig. S2** 3-D stacking motif of complexes **3**

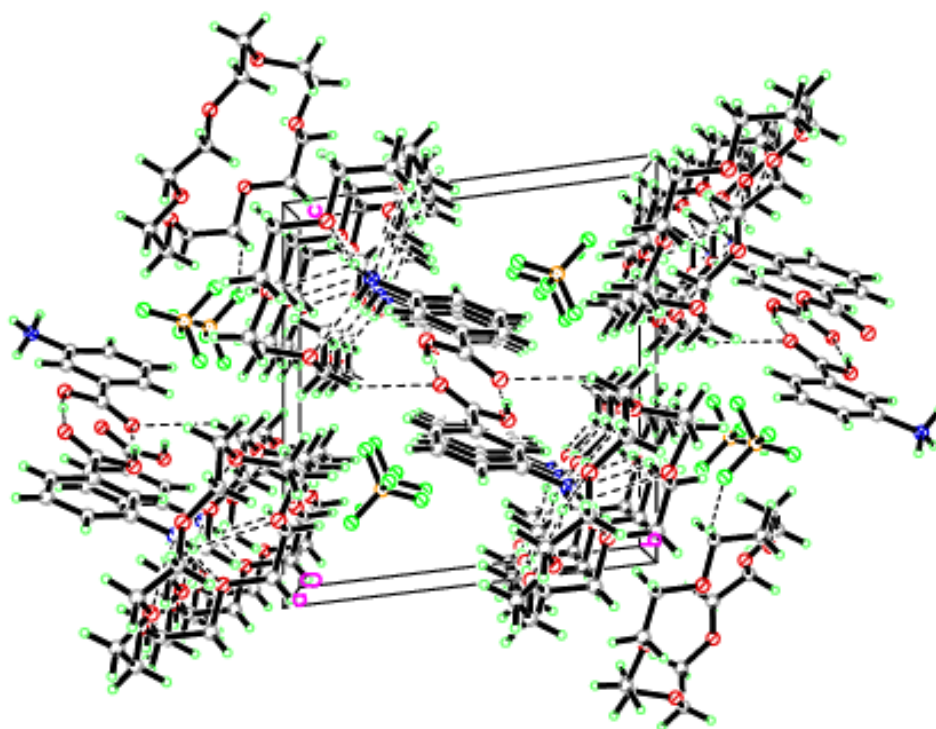

**Fig. S3** 3-D stacking motif of complexes 4

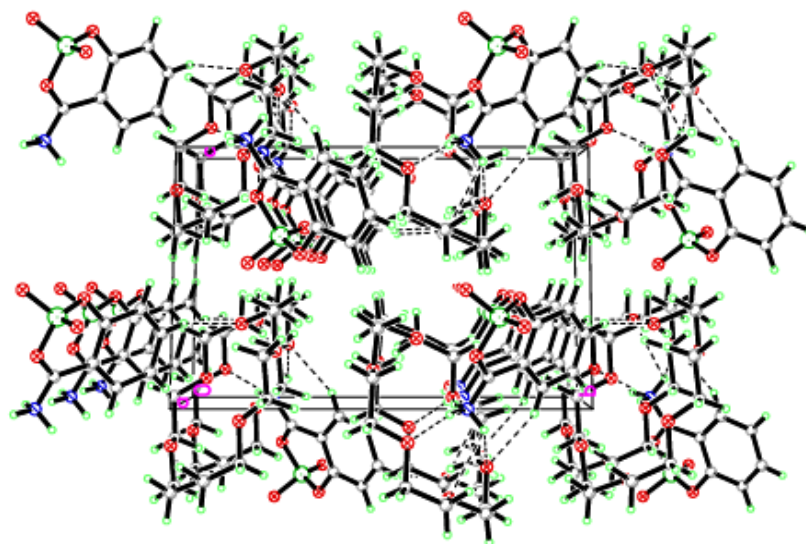

**Fig. S4** 3-D stacking motif of complexes **5**
